# Supplementary material for: Privacy Risks from Genomic Data-Sharing Beacons
Source: PubMed Central journal article supplement — Am J Hum Genet. 2015 Oct 29;97(5):631–46. doi: 10.1016/j.ajhg.2015.09.010 (PMC4667107; doi:10.1016/j.ajhg.2015.09.010), 2015-10-29
Supplement: mmc1.pdf [file mmc1.pdf]

**The American Journal of Human Genetics**

**Supplemental Data**

# **Privacy Risks from Genomic Data-Sharing Beacons**

**Suyash S. Shringarpure and Carlos D. Bustamante**

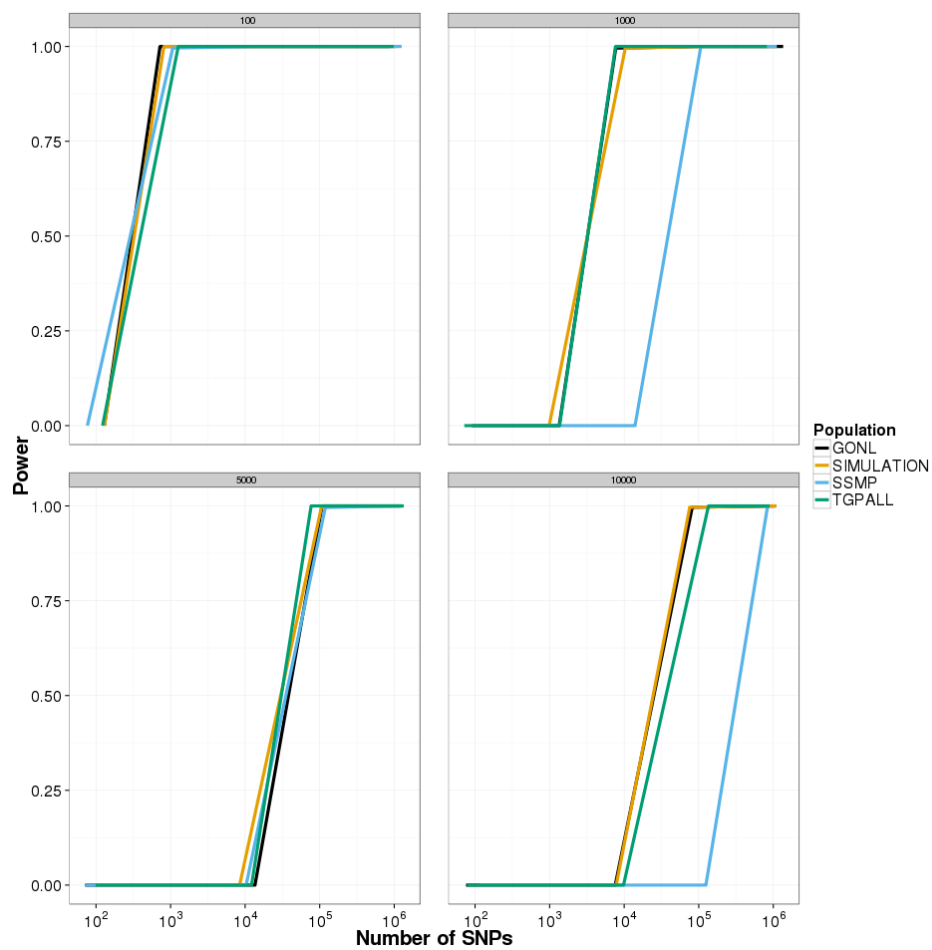

Figure S1: Theoretical power curves for SFS parameters estimated from different WGS datasets in Table S1 (TGPALL: 1000 Genomes Phase 1 WGS data). Panels show results for different beacon sizes. The curves are jittered to avoid overplotting.

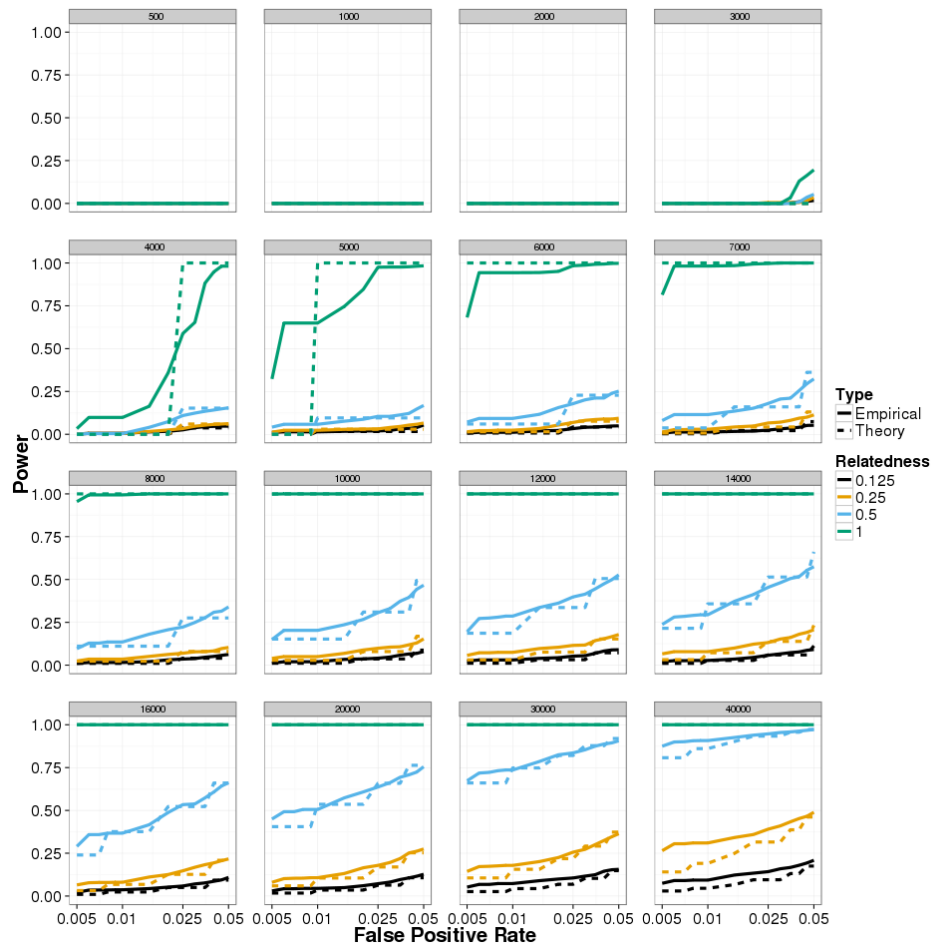

Figure S2: Receiver Operating Characteristic (ROC) curve of the LRT test for detecting relatives. Power at detecting relatives is diminished for detecting parents and siblings. Different panels show different number of SNPs queried. The X-axis is logarithmic in scale.

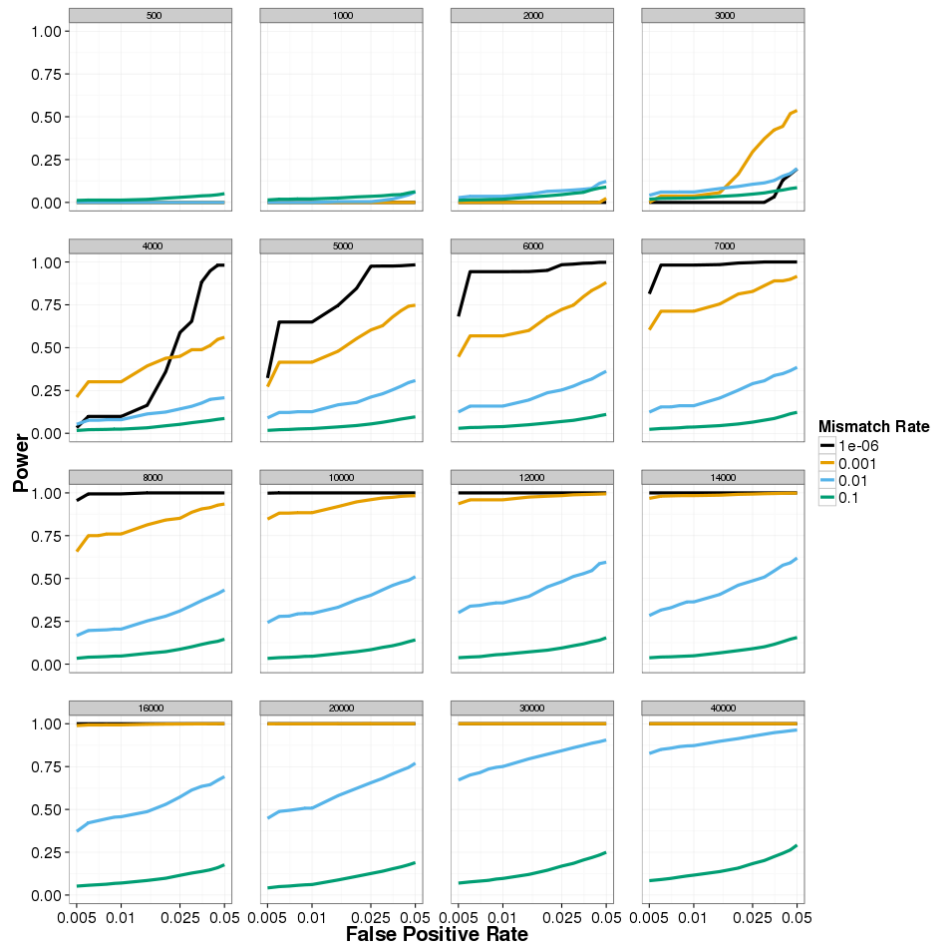

Figure S3: ROC curve of the LRT test for different error rates. Power is diminished with increasing errors. Different panels show different number of SNPs queried. The X-axis is logarithmic in scale.

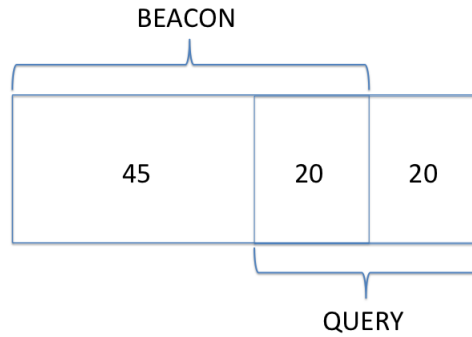

Figure S4: 1000 Genomes Phase 1 CEU beacon setup. Of the 85 CEU samples, 65 are used in the beacon. 20 samples from the beacon and the remaining 20 samples are used as query genomes.

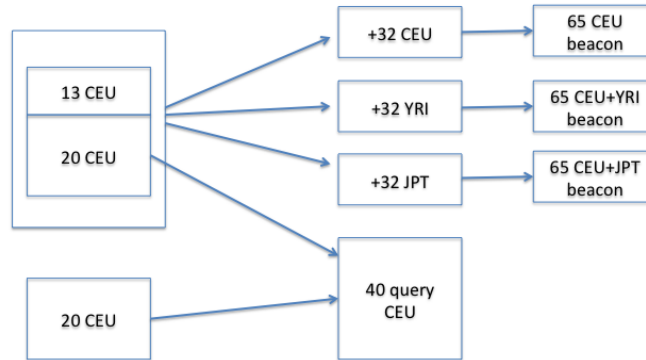

Figure S5: Multi-population beacon setup. 33 CEU individuals are common to each beacon and 32 are unique to each beacon. The same 40 CEU individuals are used to query each beacon.

| Dataset                               | Number of samples | Estimated $a'$ | Estimated $b'$ |
|---------------------------------------|-------------------|----------------|----------------|
| <b>Simulation</b>                     | 1000              | 0.1300         | 1.1300         |
| SSMP                                  | 100               | 0.1848         | 0.8500         |
| GoNL                                  | 498               | 0.1131         | 0.8574         |
| 1000 Genomes Phase 1                  | 1092              | 0.0735         | 1.0096         |
| 1000 Genomes Phase 1 Affymetrix array | 1074              | 0.6483         | 1.2876         |

Table S1: Beta distribution parameters estimated from site frequency spectra for simulation data and some public whole-genome datasets. Only the SNP array data has considerably different parameters from the rest.

| Mismatch rate $\delta$ | Error type modeled                                          |
|------------------------|-------------------------------------------------------------|
| $10^{-6}$              | Ideal setting, almost zero noise                            |
| 0.001                  | Genotype discordance between the same SNP in two replicates |
| 0.01                   | Typical fraction of unique SNPs in two replicates           |
| 0.1                    | Upper bound on fraction of unique SNPs in two replicates    |

Table S2: Error types modeled by the mismatch rate  $\delta$

| Beacon                          | Public data | Phenotype                  |
|---------------------------------|-------------|----------------------------|
| 1000 Genomes Project            | Yes         | N.A.                       |
| 1000 Genomes Project Phase 3    | Yes         | N.A.                       |
| AMPLab                          | Yes         | N.A.                       |
| <b>Broad Institute</b>          | No          | Mixture of phenotypes      |
| <b>Cafe CardioKit</b>           | No          | Cardiac diseases           |
| <b>ICGC</b>                     | No          | Cancer                     |
| <b>Kaviar</b>                   | No          | Mixture of phenotypes      |
| <b>NCBI</b>                     | No          | Mixture of phenotypes      |
| PGP                             | Yes         | N.A.                       |
| <b>IBD</b>                      | No          | Inflammatory bowel disease |
| <b>Native American+Egyptian</b> | No          | None                       |
| <b>UK10K</b>                    | No          | Mixture of phenotypes      |
| <b>SFARI</b>                    | No          | Autism spectrum disorder   |

Table S3: Phenotypes linked with the genomic data indexed by beacons. A dataset is denoted as “public” if individual-level genotype data can be downloaded without requesting access. Beacons which index non-public data are shown in bold. For beacons indexing public data, the phenotype is listed as “N.A.” (not applicable).
